# Supplementary material for: Allosteric Modulation of Hormone Release from Thyroxine and Corticosteroid-binding Globulins
Source: PubMed Central journal article supplement — J Biol Chem. 2011 Feb 16;286(18):16163–73. doi: 10.1074/jbc.M110.171082 (PMC3091225; doi:10.1074/jbc.m110.171082), 2011-02-16
Supplement: supp_M110.171082_jbc.M110.171082-1.pdf [file supp_M110.171082_jbc.M110.171082-1.pdf]

## Supplementary methods

*Determine the dissociation constants through a competitive binding assay:*

This method was first described by Gao et al (高振霆 et al, 中国科学 B 辑, 化学, 2004, 34(6):441-448) for the measurement of the binding affinity of a non-fluorescent ligand (L) towards a receptor (R) through its competitive binding of the same binding site on the receptor with a fluorescent probe (P).

Two equilibriums are established in competitive binding.

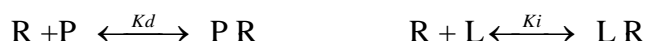

$K_d$ : dissociation constant of R and P,  $K_i$ : dissociation constant of L and R, R: receptor, P: fluorescent probe, L: ligand, P R: complex of receptor and probe, L R: complex of receptor and ligand. In the following deduction, [R], [P] and [L] represent the concentration of the free receptor, free probe and free ligand, respectively. [P R] and [L R] represent the concentration of the free complex of receptor and probe and free complex of receptor and ligand, respectively.  $[R]_t$ ,  $[P]_t$  and  $[L]_t$  represent the concentration of the total receptor, total probe and total ligand, respectively. If the receptor has only one binding site, five equations can be constructed according to above equilibrium.

$$[P]_t = [P] + [P R] \quad (1)$$

$$[L]_t = [L] + [L R] \quad (2)$$

$$[R]_t = [R] + [P R] + [L R] \quad (3)$$

$$K_d = \frac{[P] * [R]}{[P \cdot R]} \quad (4)$$

$$K_i = \frac{[L] * [R]}{[L \cdot R]} \quad (5)$$

Before the competitive ligand is added into equilibrium solution, the  $[L]_t = [L R] = 0$ . Rearrange the (1) and (3),

$$[P] = [P]_t - [P R] \quad (6)$$

$$[R] = [R]_t - [P R] \quad (7)$$

(6) and (7) are brought in (4),

$$K_d = \frac{([P]_t - [P \cdot R]) * ([R]_t - [P \cdot R])}{[P \cdot R]} \quad (8)$$

Rearrange (8),

$$[P \cdot R] = \frac{K_d + [P]_t + [R]_t - \sqrt{(K_d + [P]_t + [R]_t)^2 - 4 * [P]_t * [R]_t}}{2} \quad (9)$$

In competitive binding,  $[R]_t$ ,  $[P]_t$  and  $K_d$  is constant. The initial complex  $[P \cdot R]$  can be figured out according to (9).

After the competitive ligand is added into equilibrium solution, rearrange (1) and (2),

$$[P] = [P]_t - [P \cdot R] \quad (6)$$

$$[L] = [L]_t - [L \cdot R] \quad (10)$$

(6) and (10) are brought in (4) and (5), respectively.

$$[R] = \frac{K_d * [P \cdot R]}{[P]_t - [P \cdot R]} \quad (11)$$

$$[R] = \frac{K_i * [L \cdot R]}{[L]_t - [L \cdot R]} \quad (12)$$

Rearrange (3),

$$[L \cdot R] = [R]_t - [R] - [P \cdot R] \quad (13)$$

(11) is brought in (13),

$$[L \cdot R] = [R]_t - [P \cdot R] - \frac{K_d * [P \cdot R]}{[P]_t - [P \cdot R]} \quad (14)$$

(11) is brought in (12),

$$\frac{K_d * [P \cdot R]}{[P]_t - [P \cdot R]} = \frac{K_i * [L \cdot R]}{[L]_t - [L \cdot R]} \quad (15)$$

Rearrange (15),

$$[L]_t = [L \cdot R] * \left( \frac{K_i * ([P]_t - [P \cdot R])}{K_d * [P \cdot R]} + 1 \right) \quad (16)$$

(14) is brought in (16),

$$[L]_t = ([R]_t - [P \cdot R] - \frac{K_d * [P \cdot R]}{[P]_t - [P \cdot R]}) * \left( \frac{K_i * ([P]_t - [P \cdot R])}{K_d * [P \cdot R]} + 1 \right) \quad (17, \text{Equation II})$$

In this equation, except [P R], all parameters are constant. [P R]<sub>0</sub>: initial concentration of the free complex of receptor and probe, F: fluorescence, F<sub>0</sub>: initial fluorescence.

$$[P R] = \frac{F}{F_0} [P R]_0 \quad (18, \text{ Equation III})$$

By non-linear curve fit using (17), K<sub>i</sub> can be figured out.
