# Supplementary material for: Allosteric Modulation of Hormone Release from Thyroxine and Corticosteroid-binding Globulins
Source: PubMed Central journal article supplement — J Biol Chem. 2011 Feb 16;286(18):16163–73. doi: 10.1074/jbc.M110.171082 (PMC3091225; doi:10.1074/jbc.m110.171082), 2011-02-16
Supplement: supp_M110.171082_jbc.M110.171082-2.pdf [file supp_M110.171082_jbc.M110.171082-2.pdf]

## Supplementary Fig S1

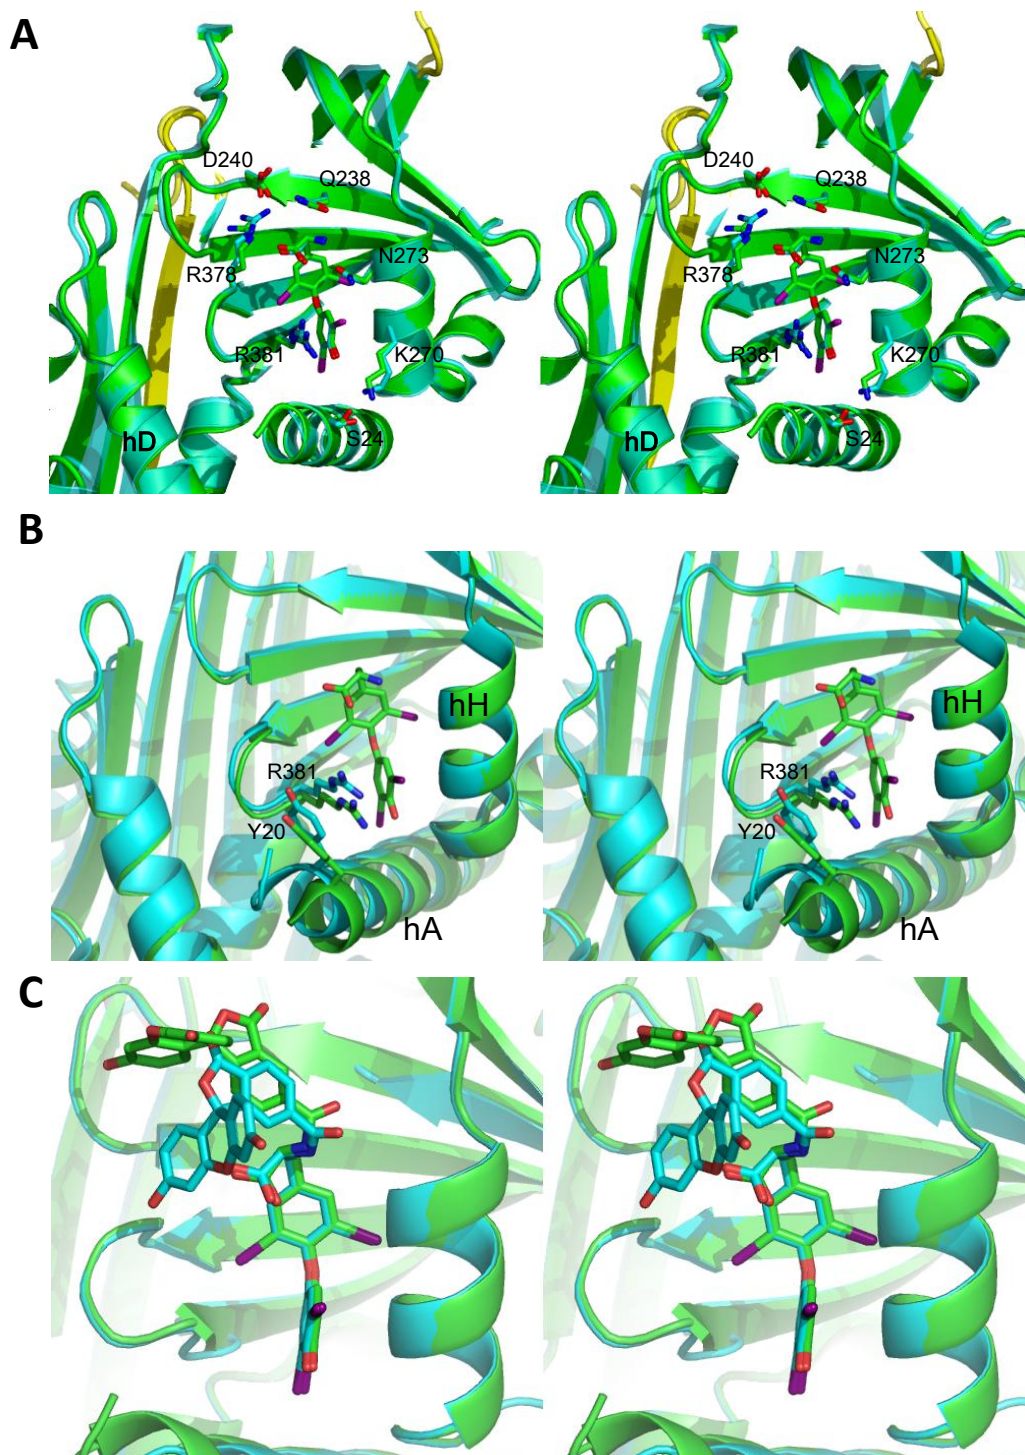

**Supplementary Figure S1:** Comparison of the crystal structures of TBG. **A.** The structures of native TBG:T4 complex (Cyan) and cleaved TBG:T4 complex (green) were overlaid by aligning hA and hH. The binding sites adopt an almost identical configuration in both structures. **B.** Overlaid hormone binding sites of cTBG (Cyan) and cTBG:T4 complex (green) showing the realignment of the side-chains from Tyr20 and Arg381 to allow the binding of thyroxine into the binding pocket with consequent shifting of the N-terminus of hA. **C.** Overlaid structures of cTBG: T4-5-CF (green) and cTBG: T4-6-CF (Cyan) showing the different orientations of fluorophore moieties.
